# Supplementary material for: SerpinB3/4 Expression Is Associated with Poor Prognosis in Patients with Cholangiocarcinoma
Source: MDPI journal article supplement (doi:10.3390/cancers16010225), 2024-01-03
Supplement: s1 [file s1]

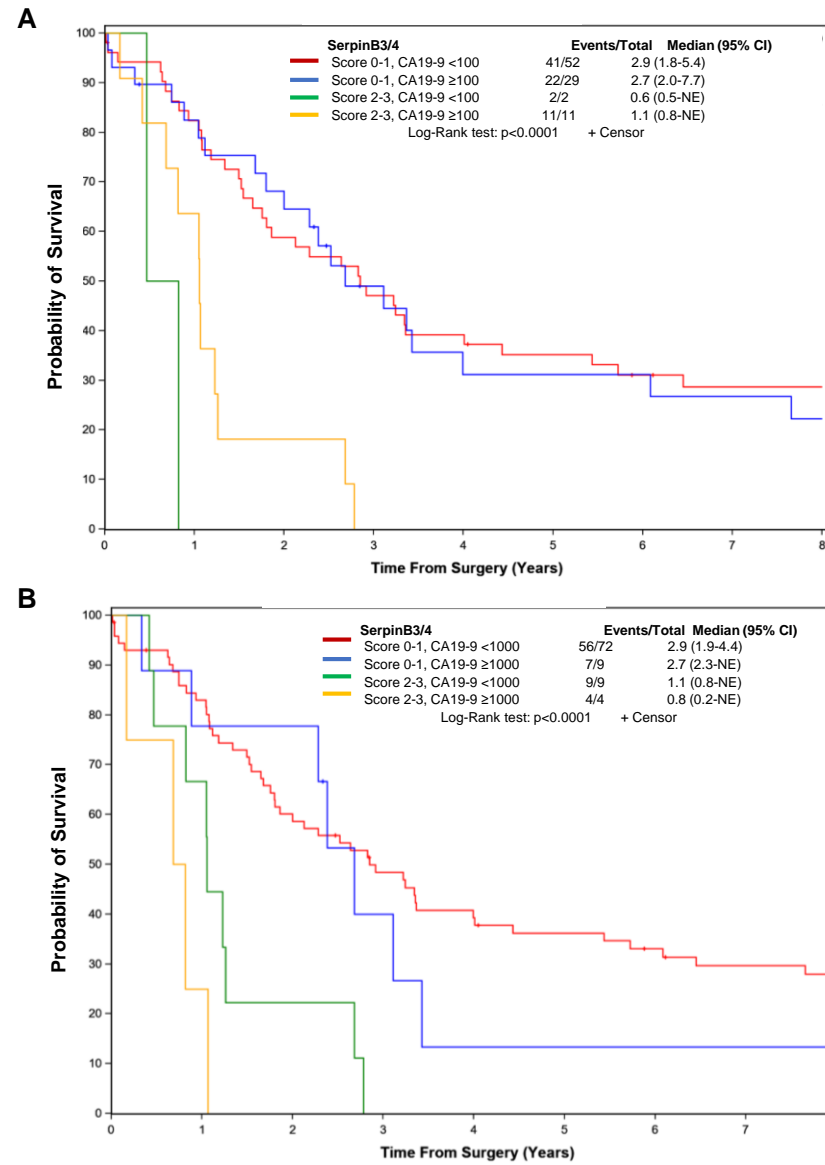

**Suppl. Figure S1. Overall Survival in CCA cases divided according to the SerpinB3/B4 score and different serum levels of CA19-9.** Overall survival was assessed in 123 CCA patients, divided according to the SerpinB3/B4 score, determined by immunohistochemistry (high SB3 = score 2-3, low SB3 = score 0-1) and different serum levels of CA19-9. In **Panel A** the CA19-9 cut-off of 100 U/mL and in **Panel B** the CA19-9 cut-off of 1000 U/mL were considered. Survival curves were estimated using Kaplan-Meier method and the differences between curves were assessed by log-rank test.
